# Supplementary material
Source: PubMed Central journal article supplement (PMC6016838)

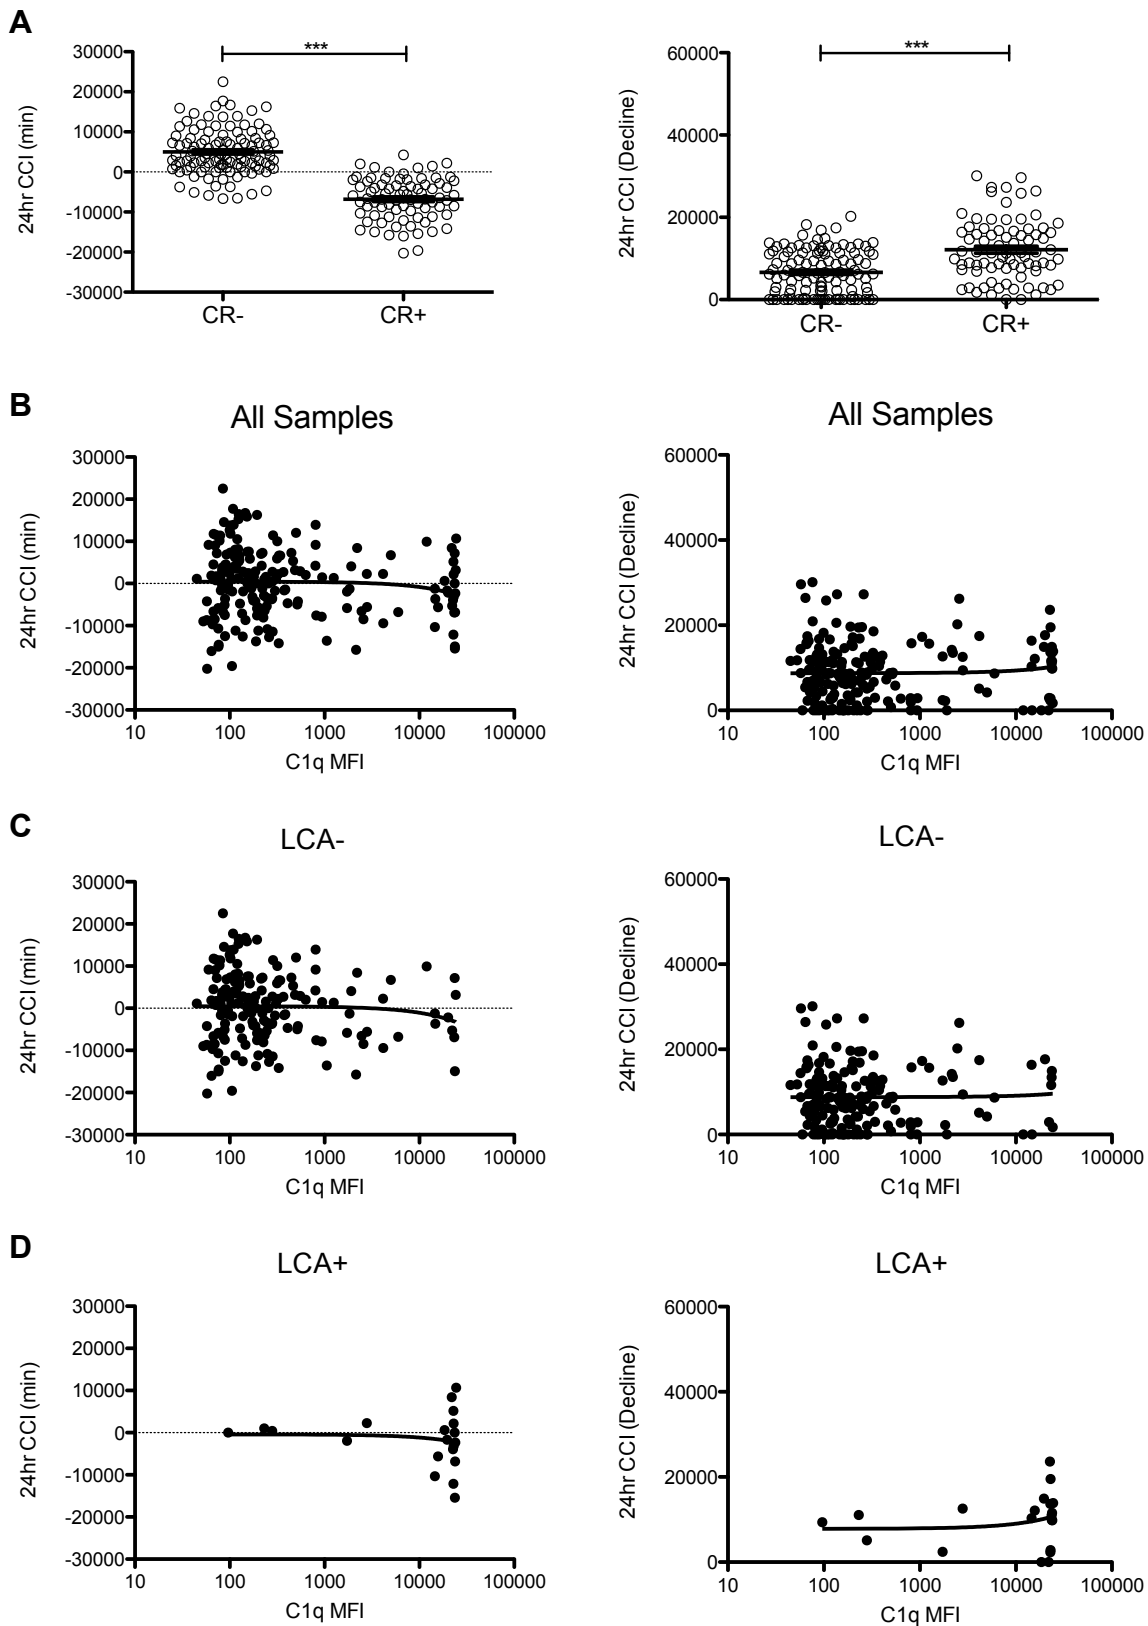

**Figure S1**

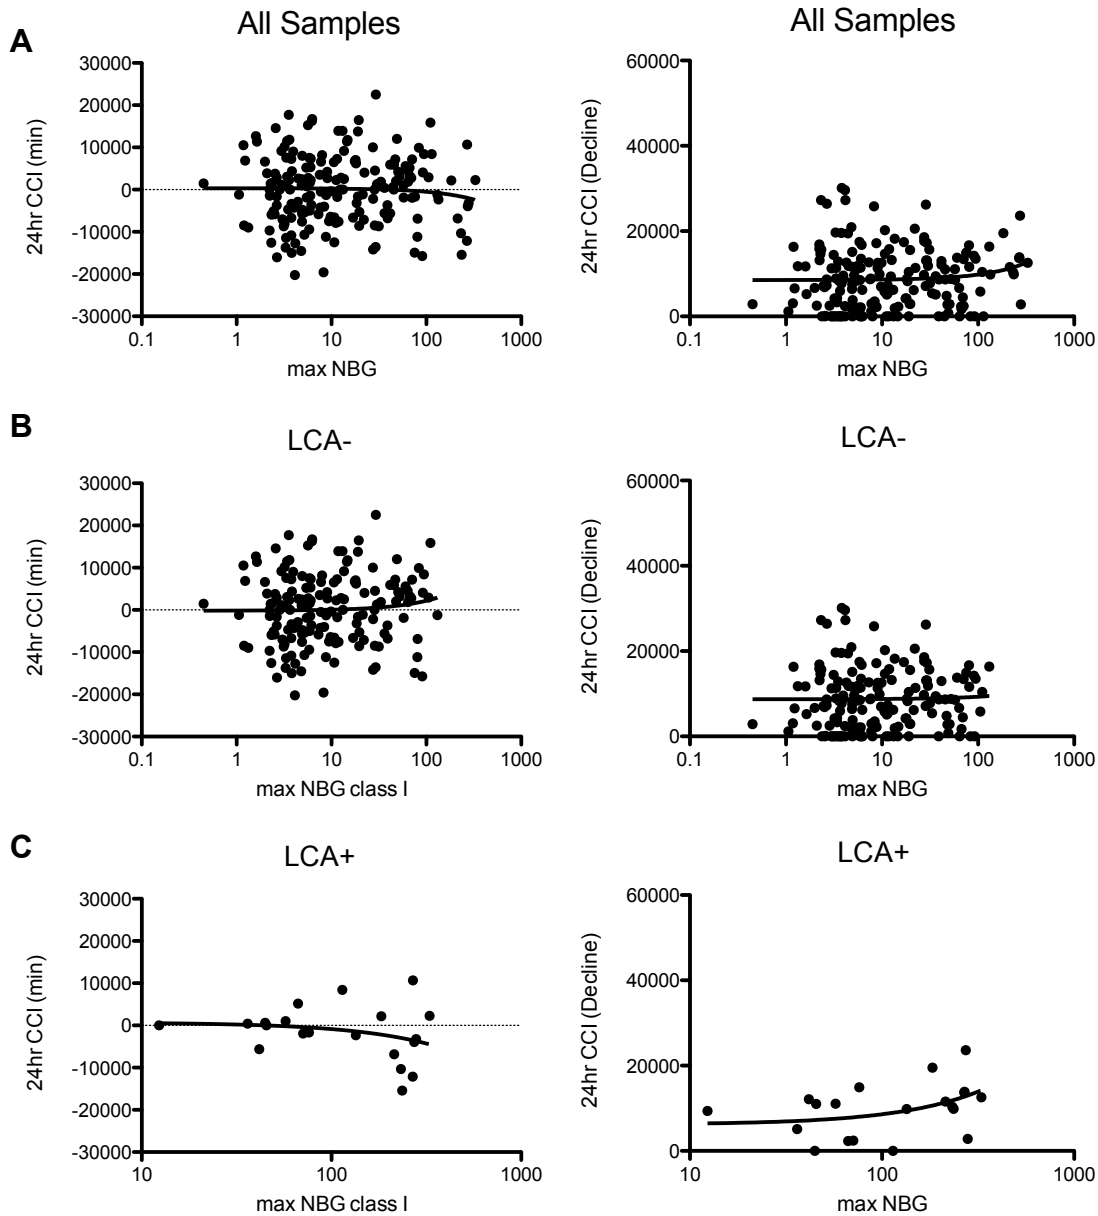

**Figure S2**

Supplement: NIHMS973687-supplement-supplement_1.pdf [file NIHMS973687-supplement-supplement_1.pdf]
